# Supplementary material for: Prevalence, patterns, and correlates of physical activity in Nepal: findings from a nationally representative study using the Global Physical Activity Questionnaire (GPAQ)
Source: PubMed Central journal article supplement (PMC6610855; doi:10.1186/s12889-019-7215-1), 2019-07-03
Supplement: 12889_2019_7215_MOESM1_ESM.pdf [file 12889_2019_7215_MOESM1_ESM.pdf]

Additional table 1. Sedentary behaviour and total and domain-specific physical activity levels of Nepalese adults by age groups

| Physical activity                      | Median; Interquartile range (95% CI) <sup>a</sup> |                              |                             |                             |                             |                             |
|----------------------------------------|---------------------------------------------------|------------------------------|-----------------------------|-----------------------------|-----------------------------|-----------------------------|
|                                        | Males                                             |                              |                             | Females                     |                             |                             |
|                                        | 15 – 29 years                                     | 30 – 44 years                | 45 – 69 years               | 15 – 29 years               | 30 – 44 years               | 45 – 69 years               |
| <b>Domains</b>                         |                                                   |                              |                             |                             |                             |                             |
| Work <sup>b</sup>                      | 4632; 8520<br>(4200 – 5040)                       | 6720; 11610<br>(5880 – 7560) | 3840; 7560<br>(3360 – 4200) | 5040; 5592<br>(5040 – 5040) | 6035; 6468<br>(5040 – 6720) | 4200; 5830<br>(4200 – 4200) |
| Transport <sup>b</sup>                 | 1680; 2520<br>(1680 – 1680)                       | 1680; 2400<br>(1680 – 1680)  | 1680; 2520<br>(1680 – 1680) | 1680; 2100<br>(1680 – 1680) | 1680; 1680<br>(1680 – 1680) | 1680; 1800<br>(1680 – 1680) |
| Leisure time <sup>b</sup>              | 0; 1774<br>(0 – 0)                                | 0; 0<br>(0 – 0)              | 0; 0<br>(0 – 0)             | 0; 0<br>(0 – 0)             | 0; 0<br>(0 – 0)             | 0; 0<br>(0 – 0)             |
| <b>Intensity bands</b>                 |                                                   |                              |                             |                             |                             |                             |
| Moderate intensity <sup>c</sup>        | 1155; 1254<br>(1050 – 1230)                       | 1260; 1050<br>(1155 – 1290)  | 1050; 1050<br>(1050 – 1050) | 1470; 1094<br>(1470 – 1470) | 1440; 1080<br>(1260 – 1470) | 1260; 1260<br>(1140 – 1260) |
| Vigorous intensity <sup>c</sup>        | 280; 859<br>(240 – 315)                           | 240; 1038<br>(180 – 360)     | 0; 630<br>(0 – 0)           | 0; 366<br>(0 – 0)           | 0; 591<br>(0 – 98)          | 0; 180<br>(0 – 0)           |
| Total physical activity <sup>b</sup>   | 8520; 9120<br>(8400 – 8760)                       | 9360; 10920<br>(9240 – 9720) | 6720; 8400<br>(6660 – 6720) | 7420; 7018<br>(7413 – 7560) | 8040; 7253<br>(7360 – 8400) | 5880; 6720<br>(5760 – 6000) |
| Total sedentary behaviour <sup>d</sup> | 2; 2<br>(2 – 2)                                   | 2; 1.67<br>(2 – 2)           | 2; 2<br>(2 – 2)             | 3; 2<br>(2 – 3)             | 2; 1<br>(2 – 2)             | 2; 2<br>(2 – 2)             |

<sup>a</sup>95% confidence interval for median

<sup>b</sup>MET-minutes/week

<sup>c</sup>Minutes/week

<sup>d</sup>Hours/day
